# Supplementary material for: Chromosomal Integration of Huge and Complex bla NDM-Carrying Genetic Elements in Enterobacteriaceae
Source: PubMed Central journal article supplement (PMC8239412; doi:10.3389/fcimb.2021.690799), 2021-06-15
Supplement: DataSheet_1.pdf [file DataSheet_1.pdf]

**Table S1. Major features of strains included in this study**

| <b>Isolate</b> | <b>Bacterium</b>                       | <b>Country</b> | <b>Year</b> | <b>Specimen</b>     | <b>Host</b>  | <b>Source</b> | <b>Accession number</b> |
|----------------|----------------------------------------|----------------|-------------|---------------------|--------------|---------------|-------------------------|
| 1701091        | <i>Providencia rettgeri</i>            | China          | 2017        | Intestinal contents | Chicken      | This study    | CP042860                |
| 1701092        | <i>Proteus mirabilis</i>               | China          | 2017        | Intestinal contents | Chicken      | This study    | CP042857                |
| QD23           | <i>Klebsiella pneumoniae</i>           | China          | 2015        | Urine               | Homo sapiens | This study    | CP042858                |
| 51003          | <i>Providencia rettgeri</i>            | China          | 2017        | Urine               | Homo sapiens | This study    | CP042861                |
| DT104          | <i>Salmonella enterica</i> Typhimurium | Canada         | 2001        | —                   | —            | GenBank       | AF261825                |
| BC22           | <i>Proteus vulgaris</i>                | China          | 2018        | Anal swab           | Swine        | GenBank       | MH160822                |
| 107            | <i>Providencia rettgeri</i>            | United Kingdom | 2002        | —                   | —            | GenBank       | AY090559                |
| KP64           | <i>K. pneumoniae</i>                   | Thailand       | 2015        | —                   | Homo sapiens | GenBank       | AP018750                |
| 3.5-R3         | <i>Escherichia coli</i>                | Australia      | 2016        | Feces               | Homo sapiens | GenBank       | KX117211                |
| 2457T          | <i>Shigella flexneri</i>               | Japan          | 1954        | Feces               | Homo sapiens | GenBank       | AE014073                |

**Table S2. Sub-regions and resistance genes in the genetic elements characterized in this work**

| Group     | Genetic element | Sub-region harbored          | Resistance marker          | Resistance phenotype                                  | Nucleotide position                                                                              |
|-----------|-----------------|------------------------------|----------------------------|-------------------------------------------------------|--------------------------------------------------------------------------------------------------|
| Novel IME | Tn6588          | In1718                       | <i>aacA4cr</i>             | Fluoroquinolone and aminoglycoside resistance         | 4053214..4053813                                                                                 |
|           |                 |                              | <i>bla<sub>OXA-1</sub></i> | β-lactam resistance                                   | 4053944..4054774                                                                                 |
|           |                 |                              | <i>catB3</i>               | Phenicol resistance                                   | 4054912..4055544                                                                                 |
|           |                 |                              | <i>arr-3</i>               | Rifampicin resistance                                 | 4055629..4056081                                                                                 |
|           |                 |                              | <i>qacED1</i>              | Quaternary ammonium compound resistance               | 4056304..4056651                                                                                 |
|           |                 |                              | <i>sulI</i>                | Sulphonamide resistance                               | 4056645..4057484                                                                                 |
|           |                 | IS26– <i>mphE</i> –IS26 unit | <i>mphE</i>                | Macrolide resistance                                  | 4064893..4065777                                                                                 |
|           |                 |                              | <i>msrE</i>                | Macrolide, Lincosamide and Streptogramin B resistance | 4065833..4067308                                                                                 |
|           |                 | In1247                       | <i>aadA2</i>               | Aminoglycoside resistance                             | 4108189..4108968                                                                                 |
|           |                 |                              | <i>lnuF2</i>               | Lincosamide                                           | 4107236..4108057                                                                                 |
|           |                 |                              | <i>ble<sub>MBL</sub></i>   | Bleomycin resistance                                  | 4077325..4077689<br>4083721..4084086<br>4090121..4090486<br>4096521..4096886<br>4102921..4103286 |
|           |                 |                              | <i>bla<sub>NDM-1</sub></i> | β-lactam resistance                                   | 4076509..4077321<br>4082905..4083717<br>4089305..4090117<br>4095705..4096517<br>4102105..4102917 |
|           |                 |                              | <i>arr-3</i>               | Rifampicin resistance                                 | 4075316..4075768                                                                                 |
|           |                 |                              |                            |                                                       |                                                                                                  |

|                     |        |                                                    |                  |                                         |                                                                                                                      |
|---------------------|--------|----------------------------------------------------|------------------|-----------------------------------------|----------------------------------------------------------------------------------------------------------------------|
|                     |        |                                                    |                  |                                         | 4081712..4082164<br>4088112..4088564<br>4094512..4094964<br>4100912..4101364                                         |
|                     |        |                                                    | <i>aphA6</i>     | Aminoglycoside resistance               | 4070374..4071153                                                                                                     |
|                     |        |                                                    | <i>qacED1</i>    | Quaternary ammonium compound resistance | 4074746..4075093<br>4081143..4081489<br>4087542..4087889<br>4093942..4094289<br>4100342..4100689<br>4106741..4107088 |
|                     |        |                                                    | <i>sul1</i>      | Sulphonamide resistance                 | 4073913..4074752<br>4080312..4081149<br>4086709..4087548<br>4093109..4093948<br>4105908..4106747<br>4099509..4100348 |
|                     |        | ISCR2- <i>floR</i> unit                            | <i>floR</i>      | Phenicol resistance                     | 4117563..4118777                                                                                                     |
|                     |        | ISCR2- <i>sul2</i> unit                            | <i>sul2</i>      | Sulphonamide resistance                 | 4121280..4122095                                                                                                     |
|                     |        | ISEc59- <i>aph(4)-Ia</i> - <i>aacC4</i> -IS26 unit | <i>aph(4)-Ia</i> | Aminoglycoside resistance               | 4126942..4127967                                                                                                     |
|                     |        |                                                    | <i>aacC4</i>     | Aminoglycoside resistance               | 4128283..4129059                                                                                                     |
|                     |        | $\Delta$ Tn4352                                    | <i>aphA1</i>     | Aminoglycoside resistance               | 4129980..4130795                                                                                                     |
|                     |        | Tn6909-related region                              | <i>dfrA12</i>    | Trimethoprim resistance                 | 4135903..4136400                                                                                                     |
|                     |        |                                                    | <i>aadA2</i>     | Aminoglycoside resistance               | 4134704..4135483                                                                                                     |
| Tn6523-related IMEs | Tn6523 | In127                                              | <i>tetA(G)</i>   | Tetracycline resistance                 | 32536..33663                                                                                                         |
|                     |        |                                                    | <i>floR</i>      | Phenicol resistance                     | 30337..31551                                                                                                         |
|                     |        |                                                    | <i>aadA2</i>     | Aminoglycoside resistance               | 27853..28644                                                                                                         |
|                     |        |                                                    | <i>qacED1</i>    | Quaternary ammonium                     | 28808..29155                                                                                                         |

|        |                                   |                                          |                              |                                         |                                                                              |
|--------|-----------------------------------|------------------------------------------|------------------------------|-----------------------------------------|------------------------------------------------------------------------------|
| Tn6589 |                                   |                                          |                              | compound resistance                     | 38268..38615                                                                 |
|        |                                   |                                          | <i>bla</i> <sub>CARB-2</sub> | β-lactam resistance                     | 37185..38051                                                                 |
|        |                                   |                                          | <i>sulI</i>                  | Sulphonamide resistance                 | 38609..39448                                                                 |
|        | In27                              |                                          | <i>dfrA12</i>                | Trimethoprim resistance                 | 4098798..4099295                                                             |
|        |                                   |                                          | <i>aadA2</i>                 | Aminoglycoside resistance               | 4097599..4098378                                                             |
|        |                                   |                                          | <i>qacED1</i>                | Quaternary ammonium compound resistance | 4078911..4079258<br>4090680..4091033<br>4097088..4097435                     |
|        |                                   |                                          | <i>sulI</i>                  | Sulphonamide resistance                 | 4078078..4078917<br>4084488..4085328<br>4089846..4090686<br>4096255..4097094 |
|        |                                   |                                          | <i>ble</i> <sub>MBL</sub>    | Bleomycin resistance                    | 4081494..4081860<br>4093267..4093632                                         |
|        |                                   |                                          | <i>bla</i> <sub>NDM-1</sub>  | β-lactam resistance                     | 4080674..4081490<br>4092451..4093263                                         |
|        |                                   |                                          | <i>arr-3</i>                 | Macrolide resistance                    | 4079481..4079933<br>4091256..4091708                                         |
|        |                                   |                                          | <i>qnrA1</i>                 | Quinolone resistance                    | 4075212..4075868<br>4086980..4087636                                         |
|        |                                   | ISCR3– <i>tetA</i> (G)– <i>floR</i> unit | <i>floR</i>                  | Phenicol resistance                     | 4071158..4072372                                                             |
|        |                                   |                                          | <i>tetA</i> (G)              | Tetracycline resistance                 | 4069046..4070221                                                             |
|        |                                   | Tn2– <i>rmtB</i> region                  | <i>bla</i> <sub>TEM-1</sub>  | β-lactam resistance                     | 4063556..4064416                                                             |
|        |                                   |                                          | <i>rmtB</i>                  | Aminoglycoside resistance               | 4064586..4065341                                                             |
|        |                                   | ISCR2– <i>floR</i> unit                  | <i>floR</i>                  | Phenicol resistance                     | 4057365..4058579                                                             |
|        |                                   | ISPa13– <i>erm42</i> –IS26 unit          | <i>erm42</i>                 | Macrolide resistance                    | 4050878..4051789                                                             |
|        | <i>aacC2</i> – <i>tmrB</i> region | <i>aacC2</i>                             | Aminoglycoside resistance    | 4041098..4041958                        |                                                                              |
|        |                                   | <i>tmrB</i>                              | Tunicamycin resistance       | 4041971..4042513                        |                                                                              |

|                     |        |                                                              |                             |                                               |                              |
|---------------------|--------|--------------------------------------------------------------|-----------------------------|-----------------------------------------------|------------------------------|
|                     |        | In363                                                        | <i>bla</i> <sub>TEM-1</sub> | β-lactam resistance                           | 4046930..4047790             |
|                     |        |                                                              | <i>dfrA1</i>                | Trimethoprim resistance                       | 4038243..4038716             |
|                     |        |                                                              | <i>qacED1</i>               | Quaternary ammonium compound resistance       | 4037191..4037539             |
|                     |        |                                                              | <i>sul1</i>                 | Sulphonamide resistance                       | 4036356..4037197             |
| Tn6512-related ICEs | Tn6512 | Tn6578                                                       | <i>aphA1</i>                | Aminoglycoside resistance                     | 12894..13709                 |
|                     |        | <i>mer</i> region                                            | <i>mer</i> locus            | Mercuric resistance                           | 80391..83682                 |
|                     | Tn6575 | Truncated ISEc59- <i>aph(4)-Ia</i> - <i>aacC4</i> -IS26 unit | <i>aph(4)-Ia</i>            | Aminoglycoside resistance                     | 12989..14014<br>44227..45252 |
|                     |        |                                                              | <i>aacC4</i>                | Aminoglycoside resistance                     | 14243..15019<br>43222..43998 |
|                     |        | Unnamable In element                                         | <i>aacA4cr</i>              | Fluoroquinolone and aminoglycoside resistance | 33722..34321<br>30630..31229 |
|                     |        |                                                              | <i>bla</i> <sub>OXA-1</sub> | β-lactam resistance                           | 32761..33591                 |
|                     |        |                                                              | <i>catB3</i>                | Phenicol resistance                           | 31991..32623                 |
|                     |        |                                                              | <i>arr-3</i>                | Rifampicin resistance                         | 30081..30533<br>31454..31906 |
|                     |        |                                                              | <i>ampC</i>                 | β-lactam resistance                           | 24780..25919                 |
|                     |        |                                                              | <i>qacED1</i>               | Quaternary ammonium compound resistance       | 29511..29858                 |
|                     |        |                                                              | <i>sul1</i>                 | Sulphonamide resistance                       | 22364..23203<br>28678..29517 |
|                     |        | Tn4352                                                       | <i>aphA1</i>                | Aminoglycoside resistance                     | 35254..36069                 |
|                     |        | IS26- <i>cfr</i> -IS26 unit                                  | <i>cfr</i>                  | Phenicol resistance                           | 37586..38635                 |
|                     |        | Tn6581a                                                      | <i>bleO</i>                 | Bleomycin resistance                          | 41824..42210                 |
|                     |        | In525                                                        | <i>aadA2</i>                | Aminoglycoside resistance                     | 54081..54554                 |
|                     |        |                                                              | <i>ereA</i>                 | Macrolide resistance                          | 54747..55967                 |
|                     |        |                                                              | <i>dfrA32</i>               | Trimethoprim resistance                       | 54081..54554                 |

|               |                  |                                   |                                         |                                               |                                       |
|---------------|------------------|-----------------------------------|-----------------------------------------|-----------------------------------------------|---------------------------------------|
|               |                  | $\Delta$ Tn6309                   | <i>tetA(C)</i>                          | Tetracycline resistance                       | 61430..62620                          |
|               |                  | $\Delta$ Tn125-2                  | <i>bla<sub>NDM-1</sub></i>              | $\beta$ -lactam resistance                    | 65690..66502                          |
|               |                  |                                   | <i>ble<sub>MBL</sub></i>                | Bleomycin resistance                          | 66506..66871                          |
|               |                  | Tn6911-related region             | <i>qacED1</i>                           | Quaternary ammonium compound resistance       | 75746..76093                          |
|               |                  |                                   | <i>sul1</i>                             | Sulphonamide resistance                       | 74913..75752                          |
|               |                  | Truncated ISCR2- <i>floR</i> unit | <i>floR</i>                             | Phenicol resistance                           | 84749..85963                          |
|               |                  | Truncated ISCR2- <i>sul2</i> unit | <i>sul2</i>                             | Sulphonamide resistance                       | 88619..89434                          |
|               | $\Delta$ Tn5393c | <i>strA</i>                       | Aminoglycoside resistance               | 87755..88558                                  |                                       |
|               |                  | <i>strB</i>                       | Aminoglycoside resistance               | 86919..87755                                  |                                       |
|               | Tn6576           | In525                             | <i>aadA2</i>                            | Aminoglycoside resistance                     | 4512080..4512859                      |
|               |                  |                                   | <i>ereA</i>                             | Macrolide resistance                          | 4512956..4514176                      |
|               |                  |                                   | <i>dfrA32</i>                           | Trimethoprim resistance                       | 4514369..4514842                      |
|               |                  | Truncated <i>chrA-orf98</i> unit  | <i>chrA</i>                             | Chromate resistance                           | 4516708..4517913                      |
|               |                  | Tn6581b                           | <i>bleO</i>                             | Bleomycin resistance                          | 4519258..4519644<br>4625360..4625746  |
|               |                  | Unnamable In37-like element       | <i>aacA4cr</i>                          | Fluoroquinolone and aminoglycoside resistance | 4521355..4521954<br>4625746..4628056  |
|               |                  |                                   | <i>bla<sub>OXA-1</sub></i>              | $\beta$ -lactam resistance                    | 4522085..4522915<br>4628187..4629017  |
|               |                  |                                   | <i>catB3</i>                            | Phenicol resistance                           | 4523053..4523685;<br>4629155..4629787 |
|               |                  |                                   | <i>arr-3</i>                            | Rifampicin resistance                         | 4523770..4524222<br>4629872..4630324  |
| <i>qacED1</i> |                  |                                   | Quaternary ammonium compound resistance | 4524445..4524792<br>4630547..4630894          |                                       |
| <i>sul1</i>   |                  |                                   | Sulphonamide resistance                 | 4524786..4525625<br>4630888..4631727          |                                       |

|               |                     |                                                       |                                |                            |                                                                              |
|---------------|---------------------|-------------------------------------------------------|--------------------------------|----------------------------|------------------------------------------------------------------------------|
|               |                     | ISEc59– <i>aph(4)-Ia</i><br>– <i>aacC4</i> –IS26 unit | <i>aph(4)-Ia</i>               | Aminoglycoside resistance  | 4526607..4527383                                                             |
|               |                     |                                                       | <i>aacC4</i>                   | Aminoglycoside resistance  | 4527612..4528637                                                             |
|               |                     | ISCR2– <i>sul2</i> unit                               | <i>sul2</i>                    | Sulphonamide resistance    | 4533484..4534299                                                             |
|               |                     | Truncated ISCR2– <i>floR</i> unit                     | <i>floR</i>                    | Phenicol resistance        | 4536802..4538016                                                             |
|               |                     | $\Delta$ Tn6503a                                      | <i>bla</i> <sub>CTX-M-14</sub> | $\beta$ -lactam resistance | 4547007..4547882                                                             |
|               |                     | IS26– <i>fosA3</i> –IS26 unit                         | <i>fosA3</i>                   | Fosfomycin resistance      | 4551726..4552142                                                             |
|               |                     | Tn4352                                                | <i>aphA1</i>                   | Aminoglycoside resistance  | 4554787..4555602                                                             |
|               |                     |                                                       |                                |                            | 4616494..4617309<br>4634951..4635766                                         |
|               |                     | $\Delta$ Tn6309                                       | <i>tetA(C)</i>                 | Tetracycline resistance    | 4558081..4559271                                                             |
|               |                     | $\Delta$ Tn6029                                       | <i>sul2</i>                    | Sulphonamide resistance    | 4610858..4611673                                                             |
|               |                     |                                                       | <i>strA</i>                    | Aminoglycoside resistance  | 4611734..4612537                                                             |
|               |                     |                                                       | <i>strB</i>                    | Aminoglycoside resistance  | 4612537..4613373                                                             |
|               |                     | Truncated <i>aacC2</i> – <i>tmrB</i><br>region        | <i>aacC2</i>                   | Aminoglycoside resistance  | 4614371..4615231<br>4632828..4633688<br>4859983..4860855<br>4881427..4882287 |
|               |                     | IS26– <i>mph(A)</i> –IS6100 unit                      | <i>mph(A)</i>                  | Macrolide resistance       | 4618286..4619191<br>4636743..4637648<br>4840469..4841374<br>4861920..4862830 |
|               |                     | <i>chrA</i> – <i>orf98</i> unit                       | <i>chrA</i>                    | Chromate resistance        | 4622810..4624015<br>4641267..4642472<br>4844992..4846197<br>4866450..4867655 |
|               |                     | In27                                                  | <i>dfrA12</i>                  | Trimethoprim resistance    | 4645502..4645999                                                             |
|               |                     |                                                       | <i>aadA2</i>                   | Aminoglycoside resistance  | 4644303..4645082                                                             |
| <i>qacED1</i> | Quaternary ammonium |                                                       | 4643792..4644139               |                            |                                                                              |

|  |                          |                             |                                               |                                                                              |
|--|--------------------------|-----------------------------|-----------------------------------------------|------------------------------------------------------------------------------|
|  |                          |                             | compound resistance                           |                                                                              |
|  |                          | <i>sul1</i>                 | Sulphonamide resistance                       | 4642959..4643798                                                             |
|  | <i>sil-cop</i> region    | <i>sil</i> locus            | Silver resistance                             | 4696846..4709292                                                             |
|  |                          | <i>cop</i> locus            | Copper resistance                             | 4710590..4718123                                                             |
|  | $\Delta$ Tn21            | <i>mer</i> locus            | Mercuric resistance                           | 4828474..4832436                                                             |
|  | <i>aacC2-tmrB</i> region | <i>aacC2</i>                | Aminoglycoside resistance                     | 4838550..4839410                                                             |
|  |                          | <i>tmrB</i>                 | Tunicamycin resistance                        | 4837995..4838537                                                             |
|  |                          | <i>bla</i> <sub>TEM-1</sub> | $\beta$ -lactam resistance                    | 4832718..4833578                                                             |
|  | In1021                   | <i>aacA4cr</i>              | Fluoroquinolone and aminoglycoside resistance | 4856564..4857164<br>4878020..4878619                                         |
|  |                          | <i>dfrA27</i>               | Trimethoprim resistance                       | 4855407..4855880<br>4876865..4877338                                         |
|  |                          | <i>aadA16</i>               | Aminoglycoside resistance                     | 4854381..4855226<br>4875839..4876684                                         |
|  |                          | <i>ble</i> <sub>MBL</sub>   | Bleomycin resistance                          | 4850096..4850461<br>4871554..4871919                                         |
|  |                          | <i>bla</i> <sub>NDM-3</sub> | $\beta$ -lactam resistance                    | 4849280..4850092<br>4870738..4871550                                         |
|  |                          | <i>arr-3</i>                | Rifampicin resistance                         | 4848087..4848539<br>4856014..4856467<br>4869545..4869997<br>4877471..4877923 |
|  |                          | <i>qacED1</i>               | Quaternary ammonium compound resistance       | 4847517..4847864<br>4853917..4854264<br>4868975..4869322<br>4875375..4875722 |
|  |                          | <i>sul1</i>                 | Sulphonamide resistance                       | 4846684..4847523<br>4853084..4853923                                         |



|             |        |                                                   |                               |                                               |                                      |
|-------------|--------|---------------------------------------------------|-------------------------------|-----------------------------------------------|--------------------------------------|
|             |        |                                                   |                               |                                               | 4868142..4868981<br>4874542..4875381 |
|             |        | $\Delta$ Tn5393c                                  | <i>strA</i>                   | Aminoglycoside resistance                     | 5003486..5004289                     |
|             |        |                                                   | <i>strB</i>                   | Aminoglycoside resistance                     | 5004289..5005125                     |
|             |        | ISCR2- <i>floR</i> unit                           | <i>floR</i>                   | Phenicol resistance                           | 5006081..5007295                     |
|             |        | Truncated ISCR2- <i>sul2</i> unit                 | <i>sul2</i>                   | Sulphonamide resistance                       | 5002610..5003425                     |
|             | Tn6577 | In525                                             | <i>aadA2</i>                  | Aminoglycoside resistance                     | 3266082..3266861                     |
|             |        |                                                   | <i>ereA</i>                   | Macrolide resistance                          | 3266958..3268178                     |
|             |        |                                                   | <i>dfrA32</i>                 | Trimethoprim resistance                       | 3268371..3268844                     |
|             |        | Truncated <i>chrA-orf98</i> unit                  | <i>chrA</i>                   | Chromate resistance                           | 3270710..3271915                     |
|             |        | Tn6581c                                           | <i>bleO</i>                   | Bleomycin resistance                          | 3273260..3273646                     |
|             |        | Unnamable In37-like element                       | <i>aacA4cr</i>                | Fluoroquinolone and aminoglycoside resistance | 3279093..3279692                     |
|             |        |                                                   | <i>bla<sub>OXA-1</sub></i>    | $\beta$ -lactam resistance                    | 3278132..3278962                     |
|             |        |                                                   | <i>catB3</i>                  | Phenicol resistance                           | 3277362..3277994                     |
|             |        |                                                   | <i>arr-3</i>                  | Rifampicin resistance                         | 3276825..3277277                     |
|             |        |                                                   | <i>qacED1</i>                 | Quaternary ammonium compound resistance       | 3276255..3276602                     |
|             |        |                                                   | <i>sul1</i>                   | Sulphonamide resistance                       | 3275422..3276261                     |
|             |        | IS26- <i>aacC4</i> -ISEc59- <i>aph(4)-Ia</i> unit | <i>aph(4)-Ia</i>              | Aminoglycoside resistance                     | 3281614..3282639                     |
|             |        |                                                   | <i>aacC4</i>                  | Aminoglycoside resistance                     | 3280609..3281385                     |
|             |        | ISCR2- <i>sul2</i> unit                           | <i>sul2</i>                   | Sulphonamide resistance                       | 3287486..3288301<br>3364494..3365309 |
|             |        | Truncated ISCR2- <i>floR</i> unit                 | <i>floR</i>                   | Phenicol resistance                           | 3290804..3292018                     |
|             |        | $\Delta$ Tn6503a                                  | <i>bla<sub>CTX-M-14</sub></i> | $\beta$ -lactam resistance                    | 3301009..3301884                     |
|             |        | $\Delta$ Tn6309                                   | <i>tetA(C)</i>                | Tetracycline resistance                       | 3306927..3308117                     |
|             |        | -                                                 | <i>bla<sub>HMS-1</sub></i>    | $\beta$ -lactam resistance                    | 3360360..3361223                     |
| Tn7-related | Tn7    | In2-4                                             | <i>aadA1</i>                  | Aminoglycoside resistance                     | 9884..10672                          |

|          |                             |         |                                                                |                            |                                         |                              |
|----------|-----------------------------|---------|----------------------------------------------------------------|----------------------------|-----------------------------------------|------------------------------|
| elements |                             |         | <i>sat2</i>                                                    | Aminoglycoside resistance  | 10730..11254                            |                              |
|          |                             |         | <i>dfrA1</i>                                                   | Trimethoprim resistance    | 11349..11822                            |                              |
|          | Tn6726                      | In2-3   |                                                                | <i>sat2</i>                | Aminoglycoside resistance               | 5062468..5062992             |
|          |                             |         |                                                                | <i>dfrA1</i>               | Trimethoprim resistance                 | 5063087..5063560             |
|          |                             | ΔTn1548 |                                                                | <i>dfrA12</i>              | Trimethoprim resistance                 | 5112659..5113156             |
|          |                             |         |                                                                | <i>aadA2</i>               | Aminoglycoside resistance               | 5113576..5114355             |
|          |                             |         |                                                                | <i>qacED1</i>              | Quaternary ammonium compound resistance | 5114519..5114866             |
|          |                             |         |                                                                | <i>sul1</i>                | Sulphonamide resistance                 | 5114860..5115699             |
|          |                             |         |                                                                | <i>armA</i>                | Aminoglycoside resistance               | 5119044..5119817             |
|          |                             |         |                                                                | <i>msr(E)</i>              | Macrolide resistance                    | 5122116..5123591             |
|          |                             |         |                                                                | <i>mph(E)</i>              | Macrolide resistance                    | 5123647..5124531             |
|          |                             |         | Truncated IS <i>Aba14</i> - <i>aphA6</i> -IS <i>Aba14</i> unit | <i>aphA6</i>               | Aminoglycoside resistance               | 5129839..5130618             |
|          | ΔTn125-1                    |         | <i>bla<sub>NDM-1</sub></i>                                     | β-lactam resistance        | 5133051..5133863                        |                              |
|          |                             |         | <i>ble<sub>MBL</sub></i>                                       | Bleomycin resistance       | 5133867..5134232                        |                              |
|          | 40.7-kb Tn7-related element | In2-16  |                                                                | <i>lnu(F)</i>              | Lincosamide resistance                  | 33793..34638                 |
|          |                             |         |                                                                | <i>dfrA1</i>               | Trimethoprim resistance                 | 34635..35108                 |
|          |                             |         |                                                                | <i>aadA1a</i>              | Aminoglycoside resistance               | 35125..35916                 |
|          |                             |         |                                                                | <i>bla<sub>NDM-1</sub></i> | β-lactam resistance                     | 41431..42243<br>47085..47897 |
|          |                             |         |                                                                | <i>ble<sub>MBL</sub></i>   | Bleomycin resistance                    | 41062..41427<br>46716..47081 |
|          |                             |         |                                                                | <i>qacED1</i>              | Quaternary ammonium compound resistance | 36214..36561                 |
|          |                             |         | <i>sul1</i>                                                    | Sulphonamide resistance    | 36555..37394                            |                              |
| ΔTn1548  |                             |         | <i>armA</i>                                                    | Aminoglycoside resistance  | 52047..52820                            |                              |
|          |                             |         | <i>msr(E)</i>                                                  | Macrolide resistance       | 55119..56594                            |                              |

|                        |                           |                                   |                  |                           |                  |
|------------------------|---------------------------|-----------------------------------|------------------|---------------------------|------------------|
|                        |                           |                                   | <i>mph(E)</i>    | Macrolide resistance      | 56650..57534     |
|                        |                           | $\Delta$ Tn4352                   | <i>aphA1</i>     | Aminoglycoside resistance | 62707..63522     |
| Tn6591-related<br>IMEs | Tn6591                    | Backbone                          | <i>ars</i> locus | Arsenic resistance        | 2603040..2605703 |
|                        |                           | ISCR2- <i>sul2</i> unit           | <i>sul2</i>      | Sulphonamide resistance   | 2598850..2599665 |
|                        | Tn6590                    | Backbone                          | <i>ars</i> locus | Arsenic resistance        | 2261006..2263669 |
|                        |                           | Truncated ISCR2- <i>sul2</i> unit | <i>sul2</i>      | Sulphonamide resistance   | 2267197..2268012 |
|                        |                           | $\Delta$ Tn5393c                  | <i>strA</i>      | Aminoglycoside resistance | 2266333..2267136 |
| <i>strB</i>            | Aminoglycoside resistance |                                   | 2265497..2266333 |                           |                  |
