# Supplementary material for: Chromosomal Integration of Huge and Complex bla NDM-Carrying Genetic Elements in Enterobacteriaceae
Source: PubMed Central journal article supplement (PMC8239412; doi:10.3389/fcimb.2021.690799), 2021-06-15
Supplement: Image_1.pdf [file Image_1.pdf]

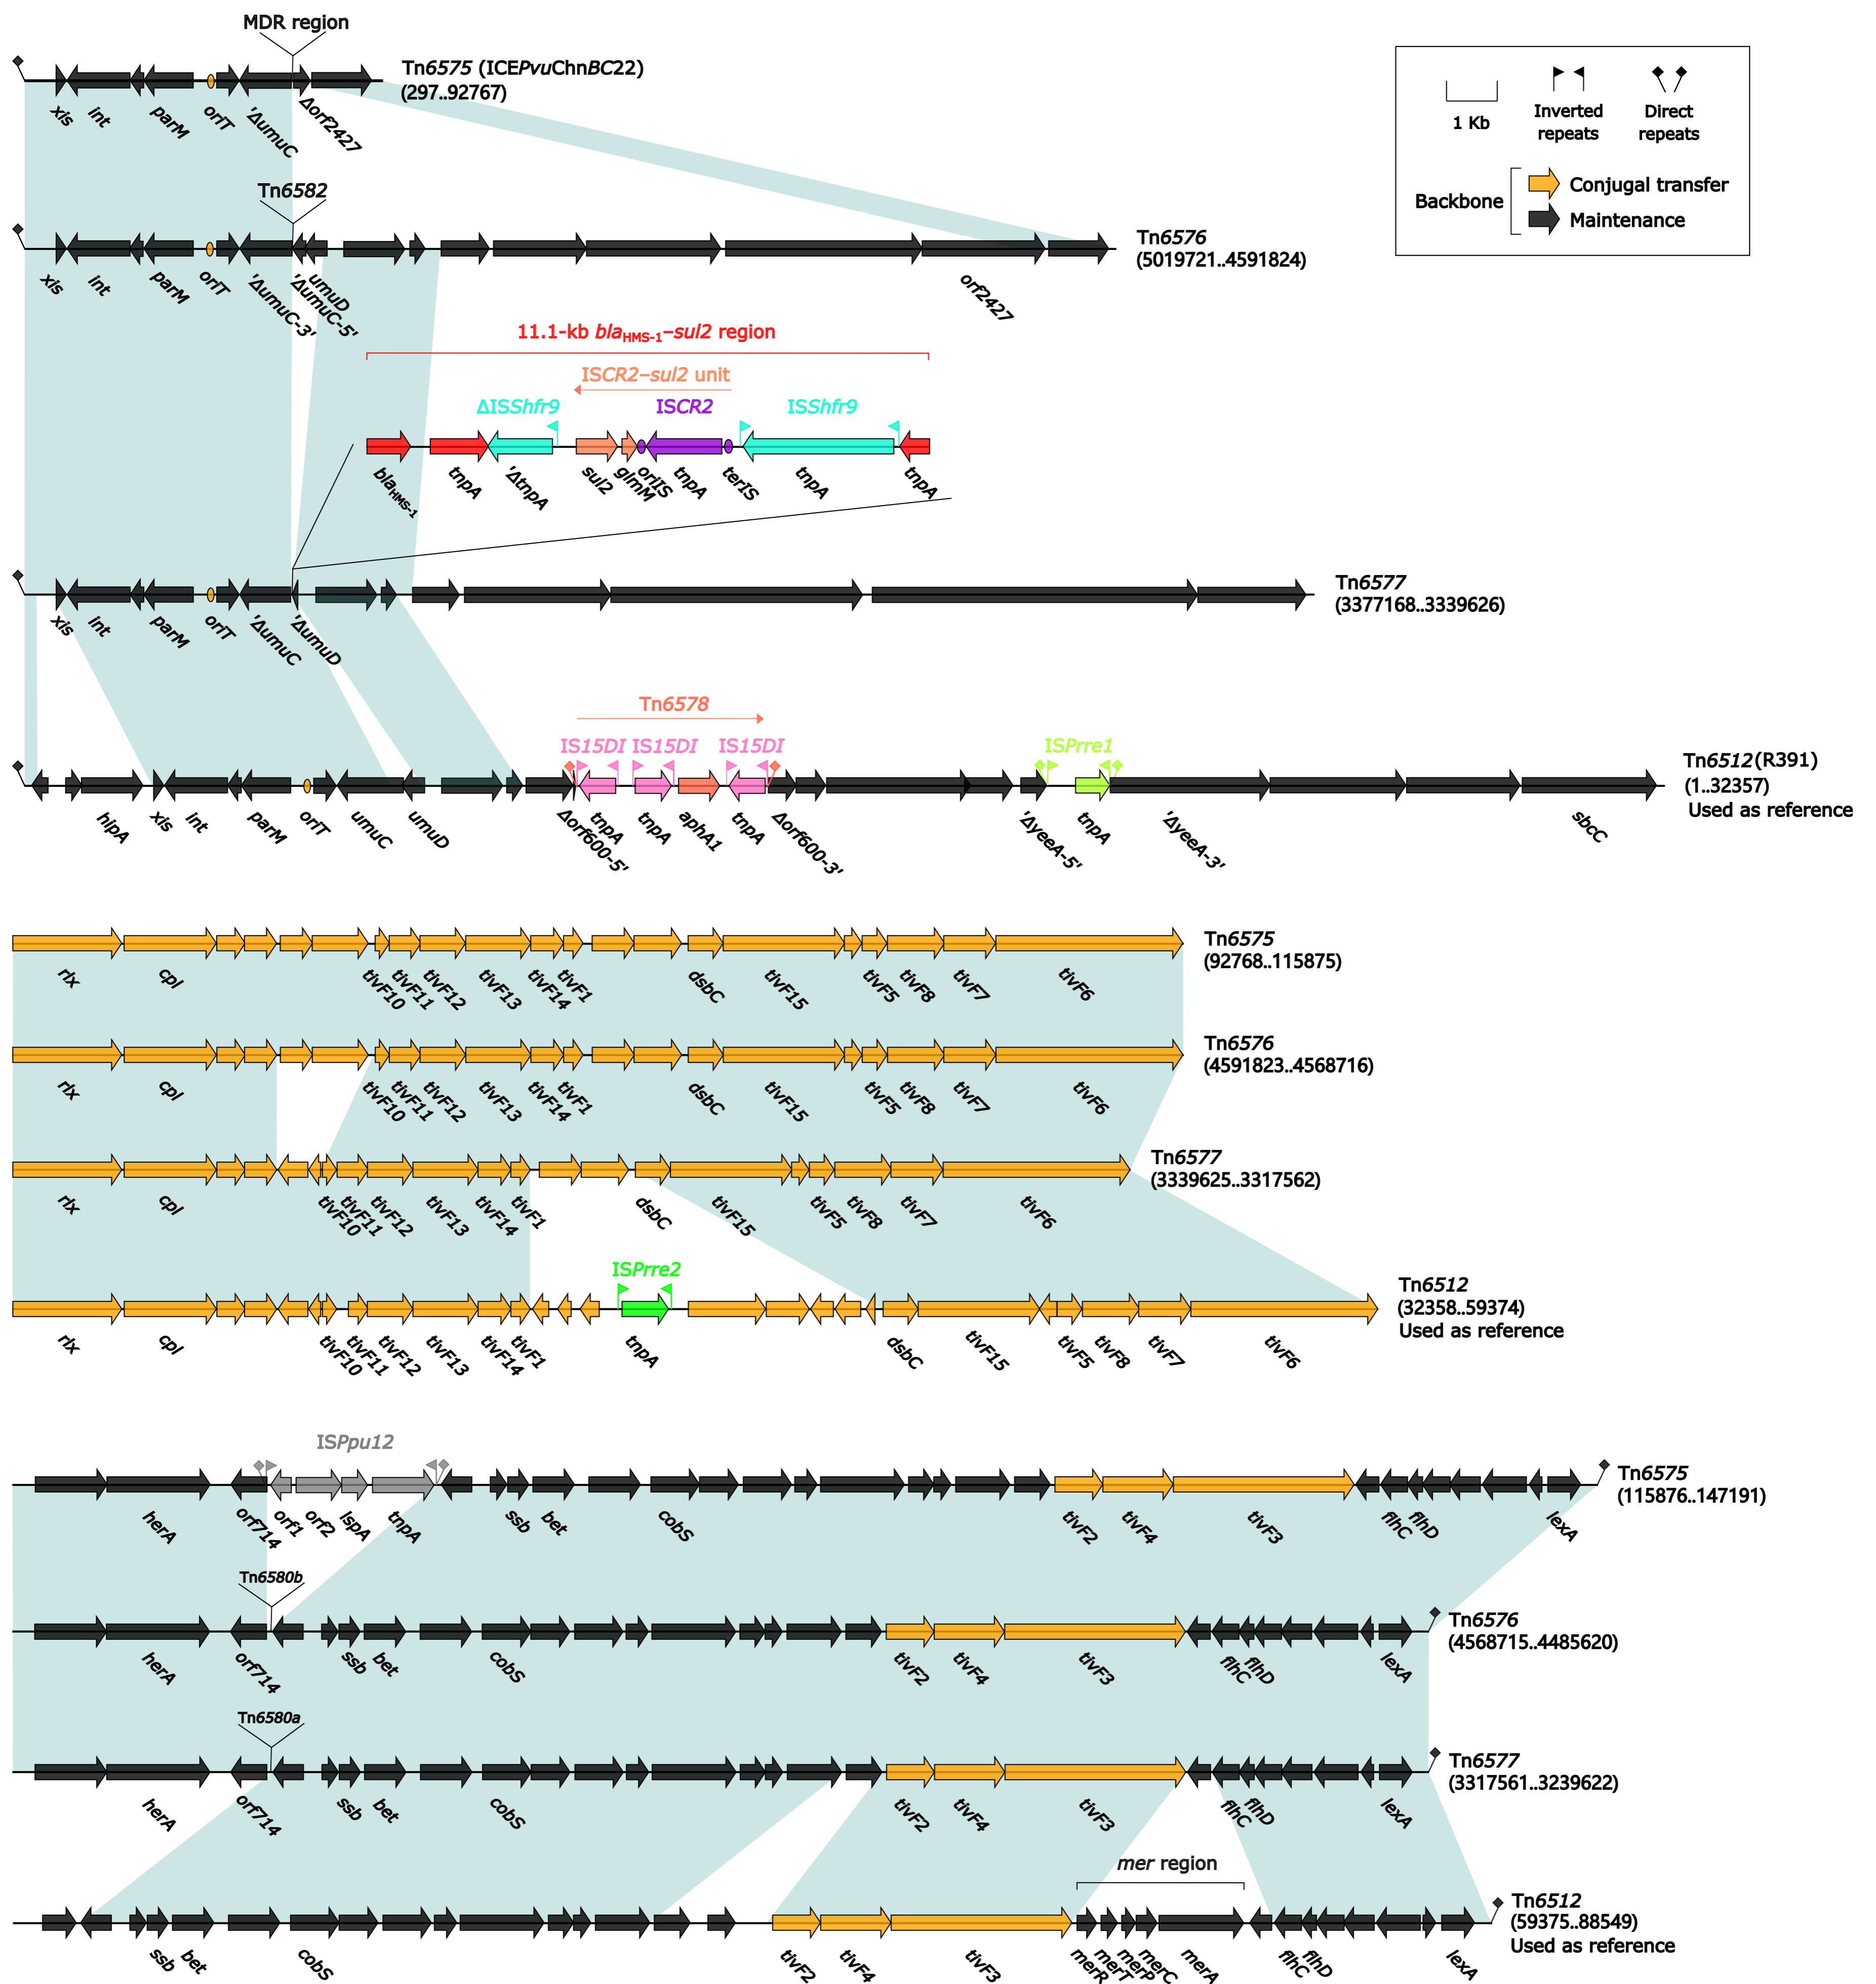

**Figure S1. Comparison of four related ICEs Tn6512, Tn6575, Tn6576, and Tn6577.**

Genes are denoted by arrows. Genes, mobile elements and other features are colored based on their functional classification. Shading denotes regions of homology (nucleotide identity  $\geq 95\%$ ). Numbers in brackets indicate nucleotide positions within Tn6512,<sup>1</sup> Tn6575, and the chromosomes of strains QD23 and 1701092, respectively. The accession number of Tn6512 used as reference is AY090559.

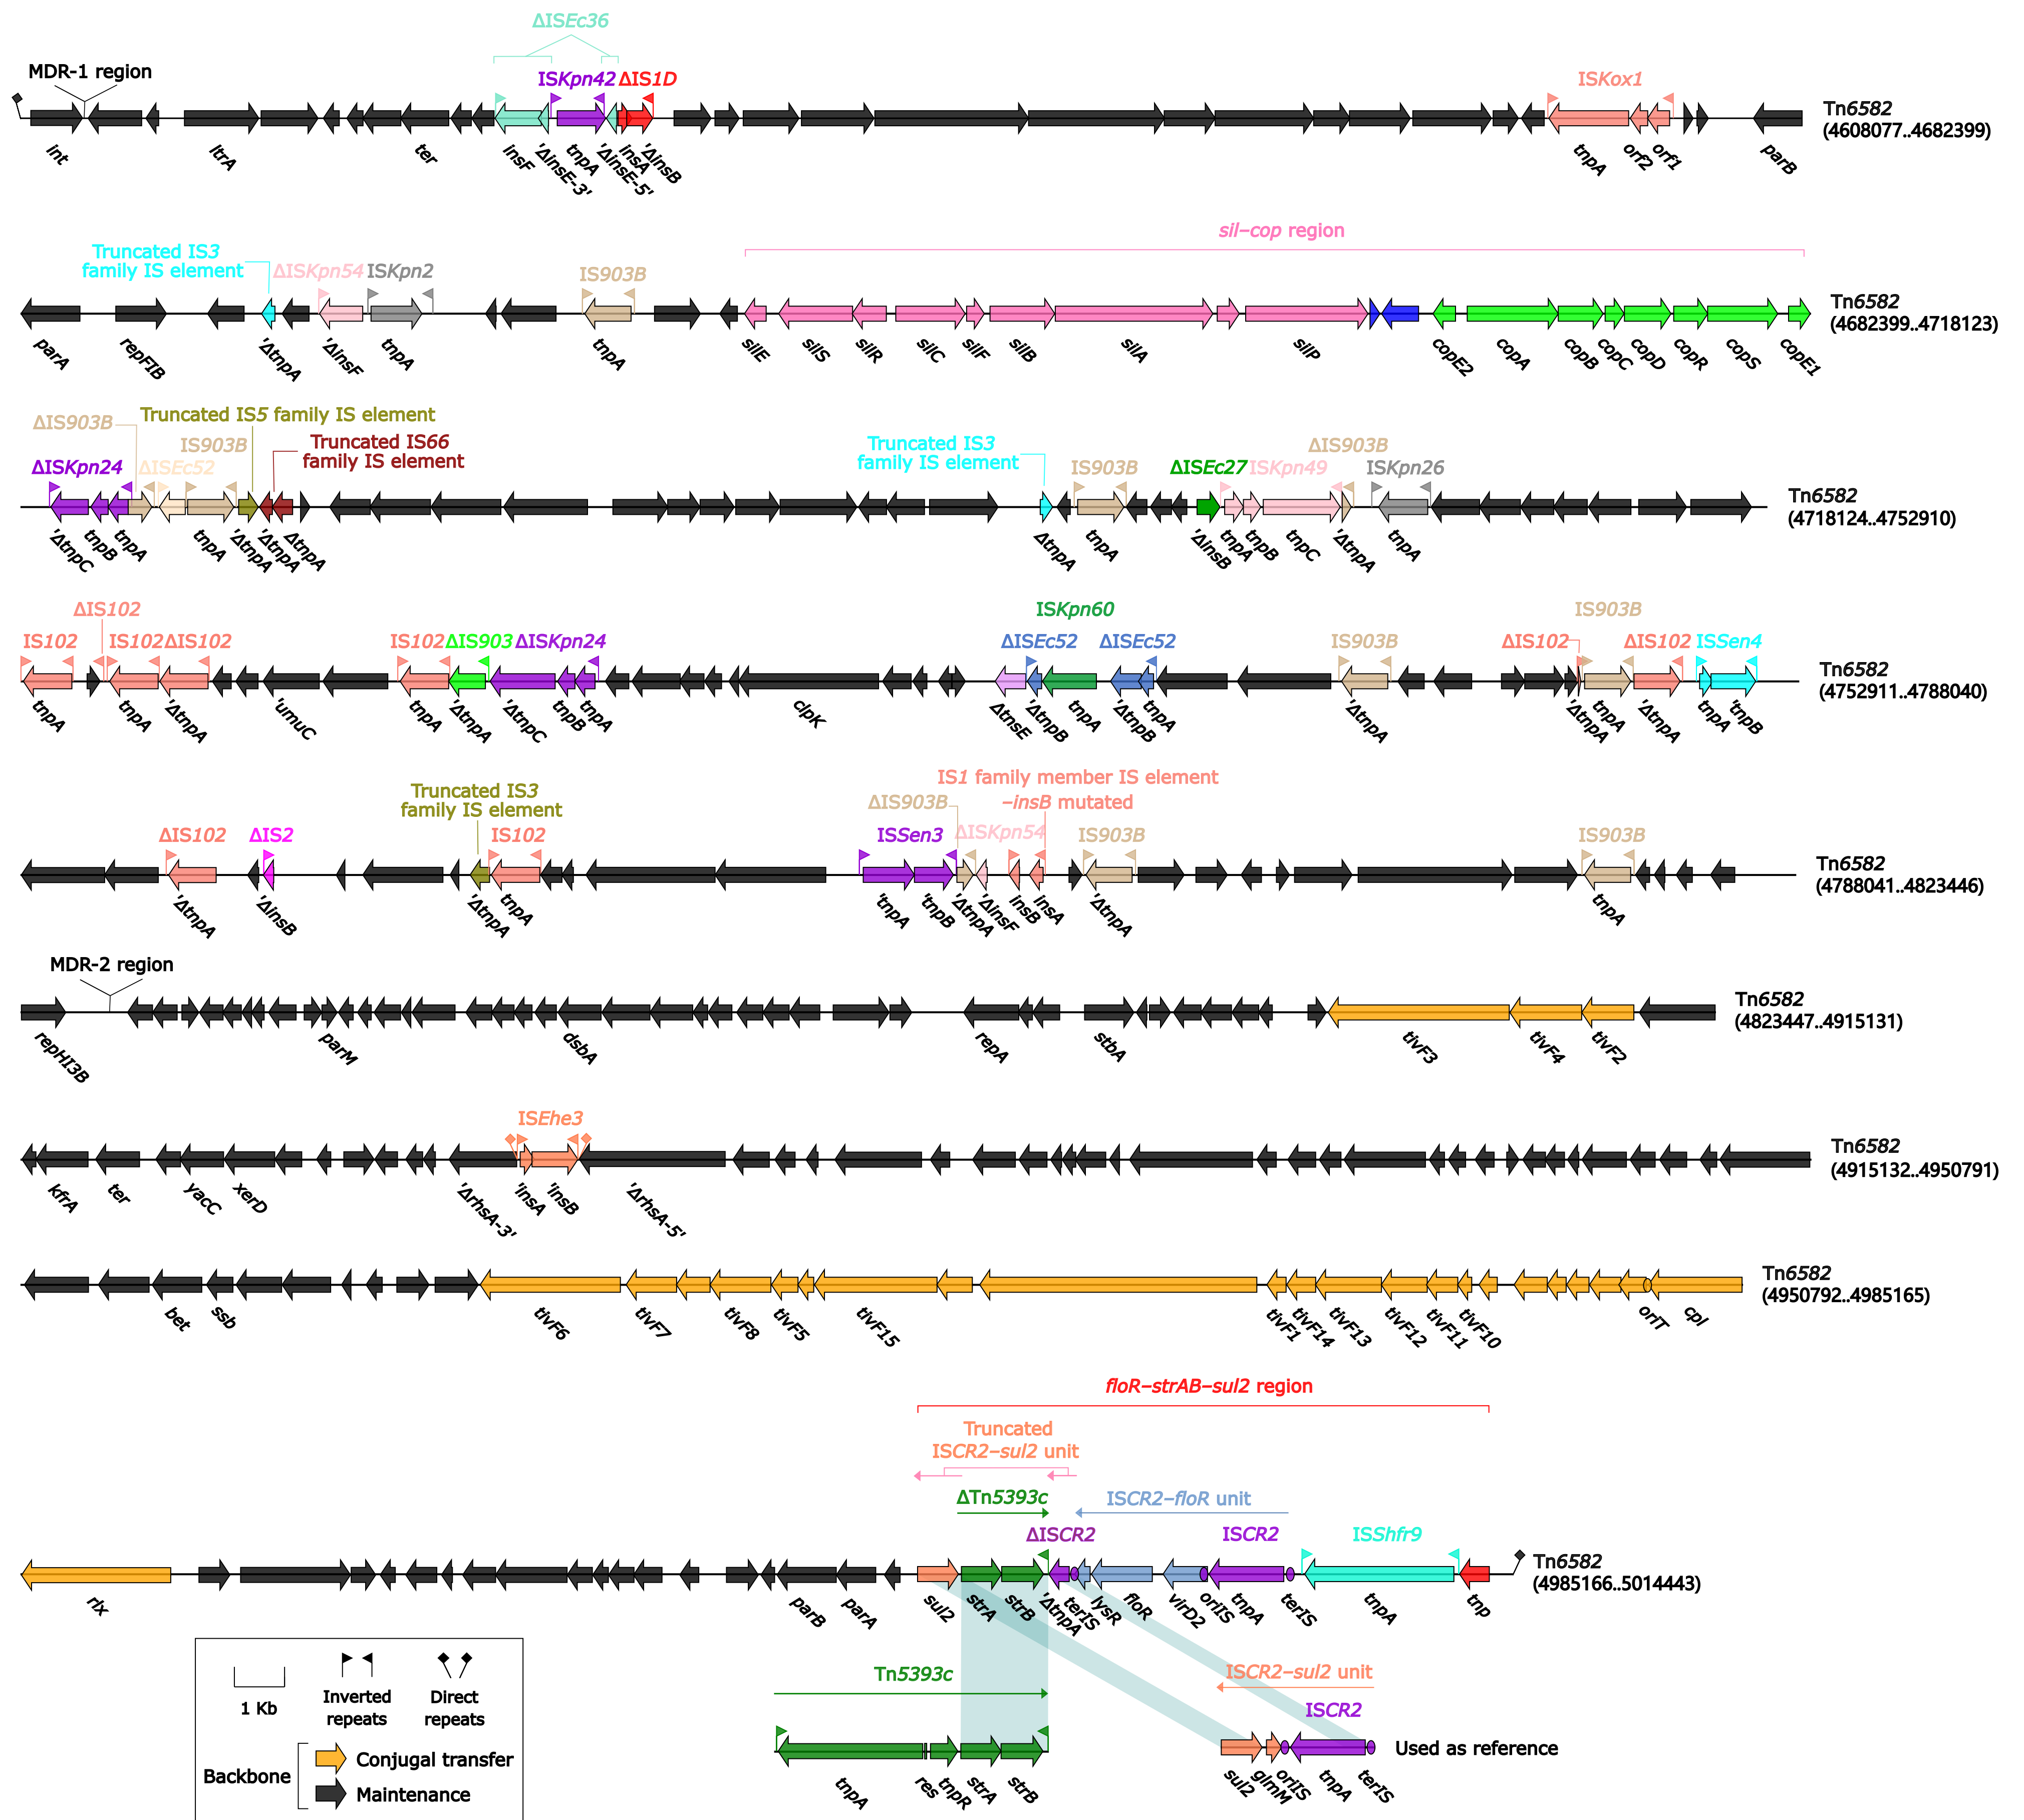

**Figure S2. Organization of Tn6582, and comparison to related regions.** Genes are denoted by arrows. Genes, mobile elements and other features are colored based on their functional classification. Shading denotes regions of homology (nucleotide identity  $\geq 95\%$ ). Numbers in brackets indicate nucleotide positions within the chromosome of strain QD23. The accession numbers of Tn5393c<sup>2</sup> and ISCR2-sul2 unit used as reference are AF262622 and AE014073, respectively.

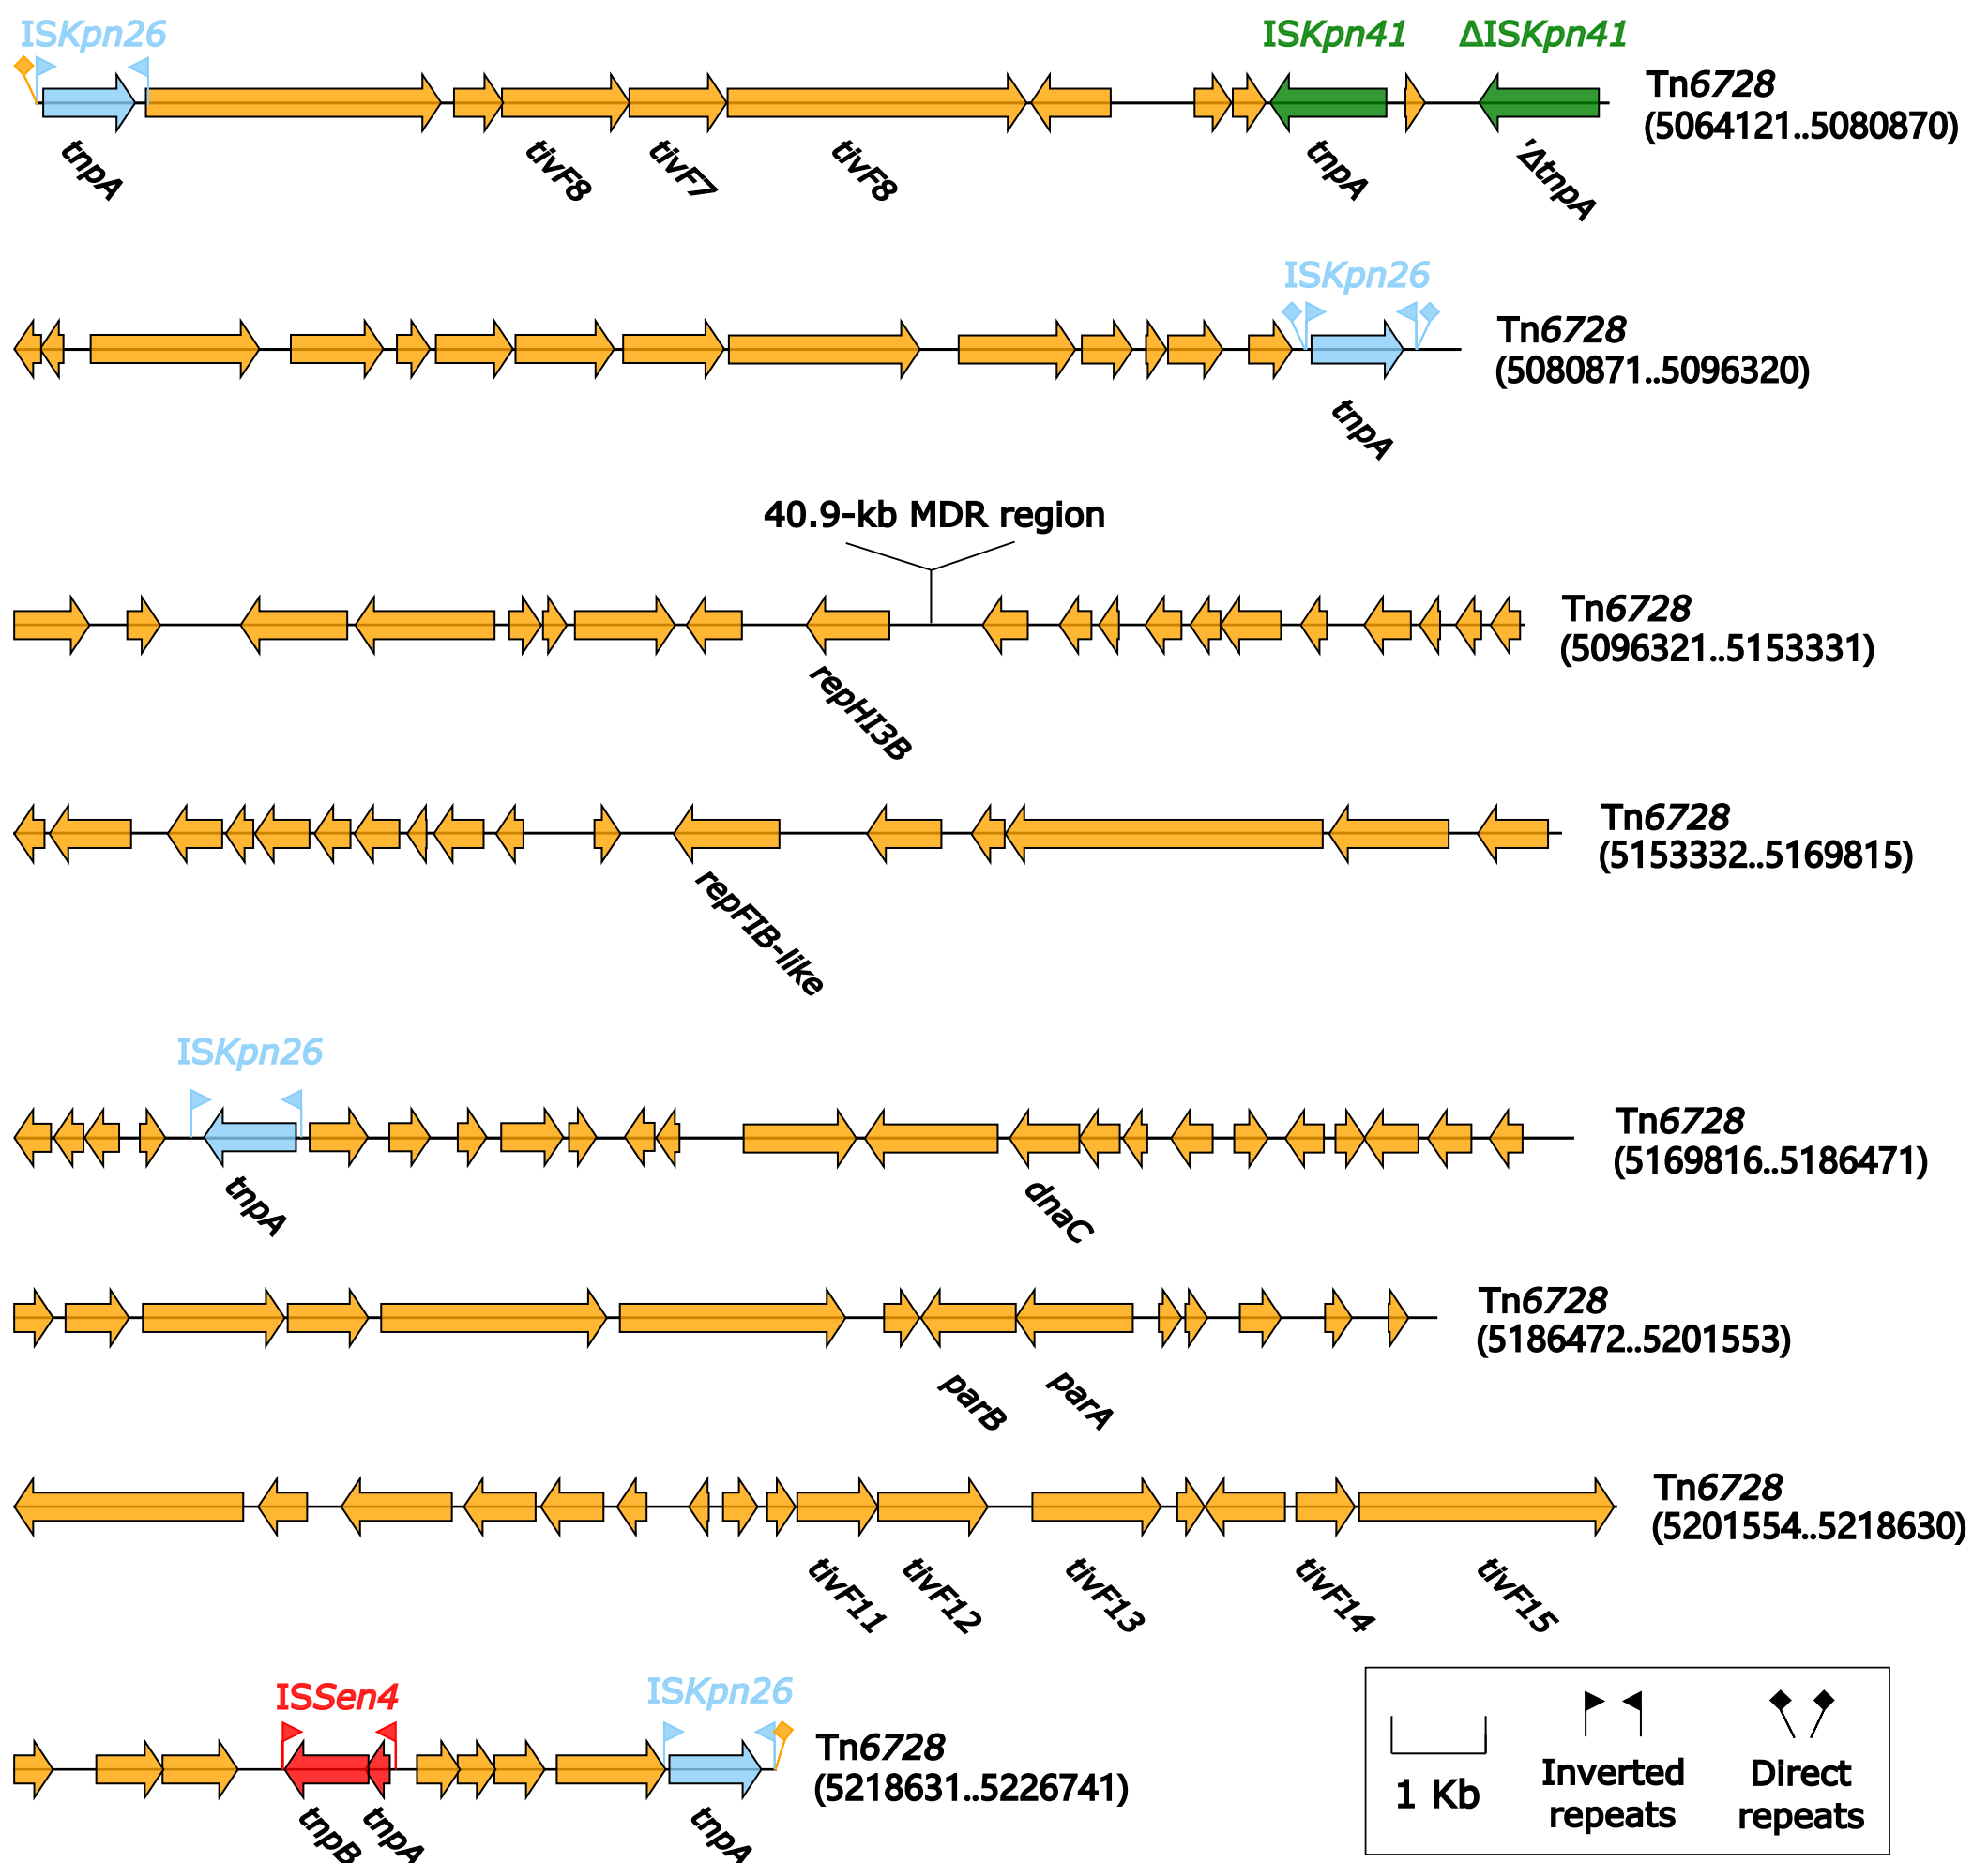

**Figure S3. Organization of Tn6728.** Genes are denoted by arrows. Genes, mobile elements and other features are colored based on their functional classification. Numbers in brackets indicate nucleotide positions within the chromosome of strain KP64.



## References

- 1** Boltner D, MacMahon C, Pembroke JT et al. R391: a conjugative integrating mosaic comprised of phage, plasmid, and transposon elements. *J Bacteriol* 2002; **184**: 5158-69.
- 2** L'Abée-Lund TM, Sørum H. Functional Tn5393-like transposon in the R plasmid pRAS2 from the fish pathogen *Aeromonas salmonicida* subspecies *salmonicida* isolated in Norway. *Appl Environ Microbiol* 2000; **66**: 5533-5.
